# Supplementary material for: Differences in pain treatment between surgeons and anaesthesiologists in a physician staffed prehospital emergency medical service: a retrospective cohort analysis
Source: PubMed Central journal article supplement (PMC6357417; doi:10.1186/s12871-019-0683-0), 2019-01-31
Supplement: 12871_2019_683_MOESM1_ESM.pdf [file 12871_2019_683_MOESM1_ESM.pdf]

Header information fields: AOK, LKK, BKK, IKK, VdAK, AEV, Knappschaft, UV. Name, Vorname des Versicherten. geb. am. Kassen-Nr., Versicherungs-Nr., Status. Vertragsarzt-Nr., VK gültig bis, Datum.

Header information fields: Standort, Rettungsmittel, Einsatznummer. Typ: 01 O NEF, 02 O NAW, 03 O RTH, 04 O ITH, 05 O ITW, 06 O RTW, 07 O KTW. 1. Rettungstechnische Daten. Einsatzdatum, Einsatzort, Transportziel, Rettungs-Ass., Notarzt, Alarm, Ankunft, Abfahrt, Übergabe, Einsatzbereit, Ende, km (gesamt). Ausbildung: 01 O Arzt in WB, 02 O Facharzt, 00 O Fehlfahrt (Einsatzabbruch/kein Patient).

2. Notfallgeschehen / Anamnese / Erstbefund (Beschwerdebeginn, Unfallzeitpunkt, Vormedikation, Vorbehandlung)

CPR: Kollaps beobachtet: 55 O ja 55 O nein Zeitpunkt: [ ] [ ] [ ] [ ]

3. Erstbefund Zeitpunkt [ ] [ ] [ ] [ ] 3.1. Neurologie unauffällig 00 O Glasgow-Coma-Scale. Augen öffnen, beste verbale Reaktion, beste motor. Reaktion. Bewusstseinslage, Extremitätenbewegung, Pupillenweite, keine Lichtreaktion, Meningismus. Summe [ ] [ ]

3.2. Messwerte 00 O keine Temp. [ ] [ ] [ ] [ ] RR [ ] [ ] [ ] [ ] / [ ] [ ] [ ] [ ] HF [ ] [ ] [ ] [ ] Atemfrequenz [ ] [ ] [ ] [ ] pSaO2 [ ] [ ] [ ] [ ] pet CO2 [ ] [ ] [ ] [ ] Schmerz: 0 5 10. 3.3. EKG 00 O nicht untersucht. 3.4. Atmung 00 O nicht untersucht. 3.5. Psych. Zustand

4. Erstdiagnose 4.1. Erkrankung 00 O keine. ZNS/Neurologie, Herz-Kreislauf, Atmung, Abdomen. Psychiatrie, Stoffwechsel, Pädiatrie, Gynäkologie / Geburtshilfe, Sonstiges.

4.2. Verletzungen 00 O keine Unfallzeitpunkt [ ] [ ] [ ] [ ] Schädel-Hirn, Gesicht, HWS, Thorax, Abdomen, Wirbelsäule BWS/LWS, Becken, Obere Extremitäten, Untere Extremitäten, Weichteile. Unfallmechanismus. Erstdiagnose. ICD 1 [ ] [ ] [ ] [ ] ICD 2 [ ] [ ] [ ] [ ] ICD 3 [ ] [ ] [ ] [ ]
