# Supplementary material for: Differences in pain treatment between surgeons and anaesthesiologists in a physician staffed prehospital emergency medical service: a retrospective cohort analysis
Source: PubMed Central journal article supplement (PMC6357417; doi:10.1186/s12871-019-0683-0), 2019-01-31
Supplement: 12871_2019_683_MOESM2_ESM.pdf [file 12871_2019_683_MOESM2_ESM.pdf]

PAT-STAMMDATEN (GGF. MIT AUFKLEBER ÜBERKLEBEN / ÜBERDRUCKEN)
Name
Vorname
Geb. Dat.
Straße
Plz, Ort
Kasse / Nr.
Vers. Nr.

Geschlecht männlich weiblich
BMI ≤ 40 > 40
Alter Jahre
1-7 Tg 8-28 Tg

NOTARZT-EINSATZPROTOKOLL VERSION 5.0
EMPFEHLUNG DER DIVI 2013 (www.divi.de)

Einsatz Nr. Pat. Nr. Pers. Nr.
Standort

EINSATZTECHNISCHE DATEN
Einsatz-Datum
Einsatz-Ort
Einsatz-Art
Transportziel

Notarzt
Assistenz
RTW-Team

Beteiligt NEF RTW RTH NAW KTW ITH
Symptom-Beginn
Alarm
Ankunft (Einsatzort)
Ankunft (am Pat.)
Abfahrt
Übergabe
Einsatzbereit
Ende

Arzt in Weiterb. Anästhesie Pädiatrie
Facharzt Chirurgie Allg. Medizin
Andere Innere Zusatz Intensiv
Rett.Ass. Rett.San. Notfall San. (Int.)Pflieg.
Rufname eigenes Fahrzeug

NOTFALLGESCHEHEN, ANAMNESE, ERSTBEFUND, VORMEDIKATION, VORBEHANDLUNG
AZ des Pat. vor dem Ereignis
Erstthelfermaßnahmen (Laien)
First Responder

ERSTBEFUNDE - NEUROLOGIE
Augen öffnen
beste verbale Reaktion
beste motorische Reaktion
Glasgow Coma Scale

MESSWERTE INITIAL
Schmerzen
RR HF BZ
AF SpO2 Temp etCO2
EKG
ATMUNG
HAUT
PSYCHE

ERKRANKUNGEN
ZNS
Herz-Kreislauf
Atmung
Abdomen
Psychiatrie
Stoffwechsel
Pädiatrie
Gynäkologie
Sonstige

VERLETZUNGEN
Schädel-Hirn
Gesicht
Hals
Thorax
Abdomen
Wirbelsäule
Becken
Obere Extremitäten
Untere Extremitäten
Weichteile
ERSTDIAGNOSEN
NACA
SCORE INITIAL

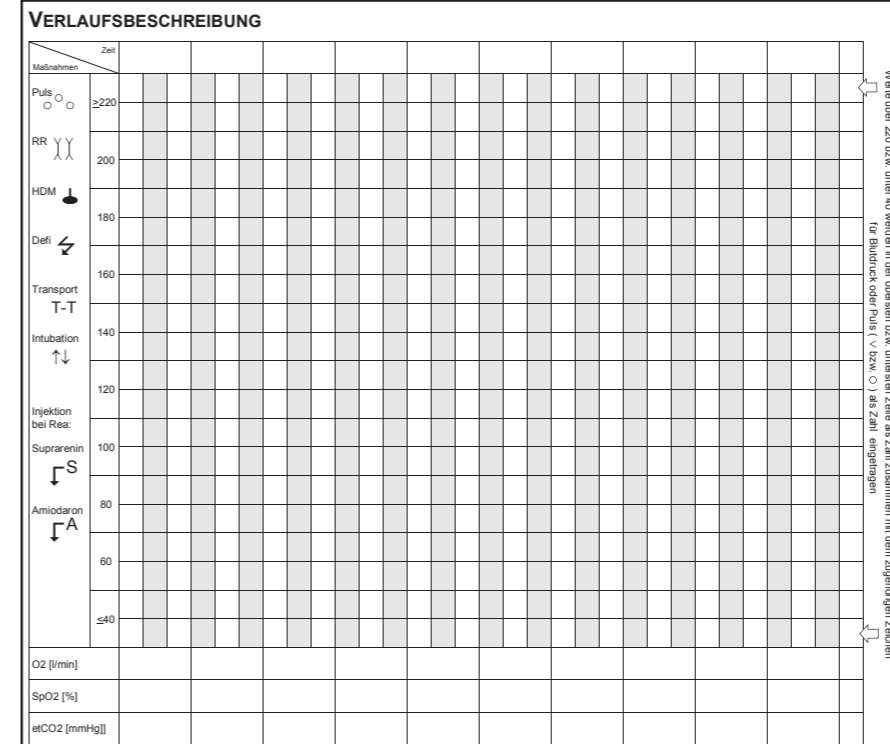

MEDIKATION
Table with columns for drug name, dose, and administration details for various categories like Infusionen, Katecholamine, Analgetika, etc.

REANIMATION / TOD / TODESFESTSTELLUNG
Reanimation
KH-Aufnahme
TOD
Todesfeststellung

ÜBERGABE
EKG
ATMUNG
BEWUSSTSEIN

EINSATZVERLAUF - BESONDERHEITEN
BEMERKUNGEN (Z.B. VERLAUF, HAUSARZT, NOTKOMPETENZ-MASSNAHMEN)
ÜBERGABE
NACA-Score
Unterschrift Notarzt

MASSNAHMEN
ZUGÄNGE
peripherer Zugang
intraossäre Punktion
Transnasal-Applikator
Sonstige

ATEMWEG
Sauerstoffgabe
Freimachen der Atemwege / Absaugen
Masken-/Beutel-Beatmung
supraglottische Atemwegshilfe
endotracheale Intubation
fiberoptische / elektronische Intubationshilfe
Koniotomie / chirurgischer Atemweg
sonstiger Atemwegszugang

BEATMUNG
manuell
maschinell
kontrolliert
assistiert
NIV
FIO2
PEEP
AF
Pmax
AMV

DEFIBRILLATION
AED vor Ort
Defi
1. Defibrillation
1. ROSC
Anzahl Defi insgesamt
Energie\_max

REANIMATION
Herzdruckmassage
Aktive Kühlung
Vorab: Telefonanleitung zur Reanimation
Spezielle Lagerung
Zervikalstütze
Schocklagerung
Vakuummatratze
Inkubator
Wärmerhalt
Sonstige
