# Supplementary material for: Differences in pain treatment between surgeons and anaesthesiologists in a physician staffed prehospital emergency medical service: a retrospective cohort analysis
Source: PubMed Central journal article supplement (PMC6357417; doi:10.1186/s12871-019-0683-0), 2019-01-31
Supplement: 12871_2019_683_MOESM4_ESM.pdf [file 12871_2019_683_MOESM4_ESM.pdf]

**Table. Univariate analysis of pain medication use**

|                               | Study population | Anaesthesiologists | Surgeons   | OR (95% CI)       | P-Value |
|-------------------------------|------------------|--------------------|------------|-------------------|---------|
| <b>Opioids</b>                |                  |                    |            |                   |         |
| ACS                           | 387 (40.9)       | 323 (42.4)         | 64 (34.4)  | 0.71 (0.51-0.99)  | 0.046   |
| Trauma                        | 484 (31.4)       | 406 (33.9)         | 78 (22.8)  | 0.58 (0.44-0.76)  | <0.001  |
| Total                         | 1287 (15.6)      | 1094 (16.9)        | 193 (11.1) | 0.61 (0.52-0.72)  | <0.001  |
| <b>Fentanyl</b>               |                  |                    |            |                   |         |
| ACS                           | 6 (0.6)          | 3 (0.4)            | 3 (1.6)    | 4.14 (0.83-20.69) | 0.08    |
| Trauma                        | 458 (29.7)       | 388 (32.4)         | 70 (20.5)  | 0.54 (0.40-0.72)  | <0.001  |
| Total                         | 689 (8.4)        | 590 (9.1)          | 99 (5.7)   | 0.60 (0.48-0.75)  | <0.001  |
| <b>Morphine</b>               |                  |                    |            |                   |         |
| ACS                           | 381 (40.2)       | 320 (42.0)         | 61 (32.8)  | 0.67 (0.48-0.94)  | 0.022   |
| Trauma                        | 27 (1.8)         | 19 (1.6)           | 8 (2.3)    | 1.49 (0.65-3.43)  | 0.35    |
| Total                         | 599 (7.3)        | 506 (7.8)          | 93 (5.3)   | 0.67 (0.53-0.84)  | <0.001  |
| <b>Ketamine</b>               |                  |                    |            |                   |         |
| ACS                           | 0 (0.0)          | 0 (0.0)            | 0 (0.0)    | n/a               | n/a     |
| Trauma                        | 203 (13.2)       | 163 (13.6)         | 40 (11.7)  | 0.84 (0.58-1.22)  | 0.36    |
| Total                         | 230 (2.8)        | 188 (2.9)          | 42 (2.4)   | 0.83 (0.59-1.16)  | 0.27    |
| <b>Butylscopolamine</b>       |                  |                    |            |                   |         |
| ACS                           | 0 (0.0)          | 0 (0.0)            | 0 (0.0)    | n/a               | n/a     |
| Trauma                        | 0 (0.0)          | 0 (0.0)            | 0 (0.0)    | n/a               | n/a     |
| Total                         | 194 (2.4)        | 152 (2.3)          | 42 (2.4)   | 1.03 (0.73-1.45)  | 0.88    |
| <b>Acetaminophen</b>          |                  |                    |            |                   |         |
| ACS                           | 0 (0.0)          | 0 (0.0)            | 0 (0.0)    | n/a               | n/a     |
| Trauma                        | 6 (0.4)          | 5 (0.4)            | 1 (0.3)    | 0.70 (0.08-6.01)  | 0.75    |
| Total                         | 92 (1.1)         | 68 (1.0)           | 24 (1.4)   | 1.32 (0.82-2.10)  | 0.25    |
| <b>Metamizole</b>             |                  |                    |            |                   |         |
| ACS                           | 19 (2.0)         | 18 (2.4)           | 1 (0.5)    | 0.22 (0.03-1.68)  | 0.15    |
| Trauma                        | 222 (14.4)       | 169 (14.1)         | 53 (15.5)  | 1.12 (0.80-1.56)  | 0.52    |
| Total                         | 712 (8.6)        | 571 (8.8)          | 141 (8.1)  | 0.91 (0.75-1.10)  | 0.34    |
| <b>At least one analgesic</b> |                  |                    |            |                   |         |
| ACS                           | 403 (42.6)       | 338 (44.4)         | 65 (34.9)  | 0.67 (0.48-0.94)  | 0.020   |
| Trauma                        | 767 (49.8)       | 610 (50.9)         | 157 (45.9) | 0.82 (0.64-1.04)  | 0.11    |
| Total                         | 2067 (25.1)      | 1693 (26.1)        | 374 (21.4) | 0.77 (0.68-0.88)  | <0.001  |

Presented as no. (%), ACS, acute coronary syndrome; Opioids, Fentanyl & Morphine; n/a, not applicable
