# Supplementary material for: Differences in pain treatment between surgeons and anaesthesiologists in a physician staffed prehospital emergency medical service: a retrospective cohort analysis
Source: PubMed Central journal article supplement (PMC6357417; doi:10.1186/s12871-019-0683-0), 2019-01-31
Supplement: 12871_2019_683_MOESM5_ESM.pdf [file 12871_2019_683_MOESM5_ESM.pdf]

**Table. Multivariate analysis of Fentanyl use**

| Factor                           | OR <sub>adj</sub> (95% CI) |                      |
|----------------------------------|----------------------------|----------------------|
|                                  | Total                      | Trauma               |
| Surgeon                          | 0.59 (0.46-0.77)           | 0.63 (0.46-0.87)     |
| Age > 65 yrs                     | 1.04 (0.87-1.25)           | 1.68 (1.31-2.15)     |
| Female Patient                   | -                          | 1.21 (0.95-1.54)     |
| Patient intubated                | 39.16 (23.41-65.53)        | 52.39 (13.33-205.94) |
| GCS < 13                         | 0.18 (0.11-0.28)           | 0.06 (0.02-0.17)     |
| Trauma                           | 11.97 (9.87-14.53)         | n/a                  |
| ACS                              | 0.13 (0.06-0.31)           | n/a                  |
| Physician qualification resident | -                          | -                    |
| Physician sex female             | 1.59 (1.30-1.95)           | 1.66 (1.27-2.18)     |

Factors included in the multivariate analysis if  $p < 0.05$  in univariate analysis; n/a, not applicable; -, not significant in univariate analysis; OR<sub>adj</sub>, adjusted Odds-Ratio in multivariate analysis; CI, Confidence Interval; yrs, years; GCS, Glasgow Coma Scale; ACS, acute coronary syndrome.
