# Supplementary material for: Differences in pain treatment between surgeons and anaesthesiologists in a physician staffed prehospital emergency medical service: a retrospective cohort analysis
Source: PubMed Central journal article supplement (PMC6357417; doi:10.1186/s12871-019-0683-0), 2019-01-31
Supplement: 12871_2019_683_MOESM6_ESM.pdf [file 12871_2019_683_MOESM6_ESM.pdf]

**Table. Multivariate analysis of Morphine use**

| <b>Factor</b>                    | <b>OR<sub>adj</sub> (95% CI)</b> |                  |
|----------------------------------|----------------------------------|------------------|
|                                  | <b>Total</b>                     | <b>ACS</b>       |
| Surgeon                          | 0.78 (0.59-1.03)                 | 0.88 (0.61-1.27) |
| Age > 65 yrs                     | 1.21 (1.00-1.48)                 | -                |
| Female Patient                   | 0.86 (0.71-1.04)                 | -                |
| Patient intubated                | -                                | -                |
| GCS < 13                         | 0.54 (0.37-0.79)                 | -                |
| Trauma                           | 0.52 (0.34-0.78)                 | n/a              |
| ACS                              | 17.57 (14.28-21.61)              | n/a              |
| Physician qualification resident | 1.62 (1.32-1.99)                 | 1.82 (1.36-2.43) |
| Physician sex female             | 1.12 (0.90-1.39)                 | 1.36 (1.01-1.84) |

Factors included in the multivariate analysis if  $p < 0.05$  in univariate analysis; n/a, not applicable; -, not significant in univariate analysis; GCS, Glasgow Coma Scale; ACS, acute coronary syndrome.
